# Supplementary material
Source: publisher site journal article supplement (https://www.spandidos-publications.com/6313/downloadSupplementary)
Supplement: Supplementary file 1 [file downloadSupplementary]

## Sheet: target_df_nm20200323
Table SI. The list of genes included in our panel.
Target	Gene reference
ABL1	NM_005157
ACTL6A	NM_004301
ACVR1	NM_001105
ADH1B	NM_000668
AKT1	NM_005163
AKT2	NM_001626
AKT3	NM_005465
ALDH2	NM_000690
ALK	NM_004304
AMER1	NM_152424
ANXA5	NM_001154
APC	NM_000038
AR	NM_000044
ARAF	NM_001654
AREG	NM_001657
ARID1A	NM_006015
ARID1B	NM_017519
ARID2	NM_152641
ASNS	NM_001673
ASPH	NM_004318
ASXL1	NM_015338
ATM	NM_000051
ATR	NM_001184
ATRX	NM_000489
AURKA	NM_003600
AURKB	NM_004217
AXIN1	NM_003502
AXIN2	NM_004655
AXL	NM_001699
B2M	NM_004048
BAP1	NM_004656
BARD1	NM_000465
BCL2	NM_000633
BCL2L1	NM_001191
BCL2L11	NM_006538
BCL6	NM_001706
BCOR	NM_017745
BCORL1	NM_021946
BLM	NM_000057
BMPR1A	NM_004329
BRAF	NM_004333
BRCA1	NM_007294
BRCA2	NM_000059
BRD2	NM_005104
BRD4	NM_014299
BRIP1	NM_032043
BTK	NM_000061
BUB1	NM_004336
CACNA1C	NM_000719
CADM2	NM_153184
CALR	NM_004343
CAMTA1	NM_015215
CAPN2	NM_001748
CARD11	NM_032415
CASP8	NM_001228
CBFB	NM_001755
CBL	NM_005188
CBLB	NM_170662
CCL18	NM_002988
CCND1	NM_053056
CCND2	NM_001759
CCND3	NM_001760
CCNE1	NM_001238
CD274	NM_014143
CD79A	NM_001783
CD79B	NM_000626
CDC73	NM_024529
CDH1	NM_004360
CDK12	NM_015083
CDK4	NM_000075
CDK6	NM_001259
CDK8	NM_001260
CDKN1A	NM_000389
CDKN1B	NM_004064
CDKN1C	NM_000076
CDKN2A	NM_000077
CDKN2B	NM_004936
CDKN2C	NM_001262
CEBPA	NM_004364
CFD	NM_001928
CHD4	NM_001273
CHEK1	NM_001274
CHEK2	NM_007194
CIC	NM_015125
CNTNAP5	NM_130773
CREBBP	NM_004380
CRKL	NM_005207
CRLF2	NM_022148
CSF1R	NM_005211
CSF3R	NM_000760
CSMD3	NM_052900
CTCF	NM_006565
CTNNB1	NM_001904
CUL3	NM_003590
CXCR4	NM_003467
CYLD	NM_015247
CYP19A1	NM_000103
DAXX	NM_001350
DDIT3	NM_004083
DDR2	NM_006182
DDX3X	NM_001356
DDX51	NM_175066
DICER1	NM_030621
DNMT3A	NM_022552
DOT1L	NM_032482
EED	NM_003797
EGFR	NM_005228
ELAC2	NM_018127
EP300	NM_001429
EPCAM	NM_002354
EPHA2	NM_004431
EPHA3	NM_005233
EPHA5	NM_004439
EPHA7	NM_004440
EPHB1	NM_004441
ERBB2	NM_004448
ERBB3	NM_001982
ERBB4	NM_005235
ERCC1	NM_001983
ERCC2	NM_000400
ERCC3	NM_000122
ERCC4	NM_005236
ERCC5	NM_000123
EREG	NM_001432
ERG	NM_004449
ERRFI1	NM_018948
ESR1	NM_000125
ESR2	NM_001437
ETV1	NM_004956
ETV4	NM_001986
ETV6	NM_001987
EWSR1	NM_005243
EXT1	NM_000127
EXT2	NM_000401
EZH2	NM_004456
FAM175A	NM_139076
FAM46C	NM_017709
FANCA	NM_000135
FANCB	NM_152633
FANCC	NM_000136
FANCG	NM_004629
FANCI	NM_018193
FANCL	NM_018062
FAT1	NM_005245
FBN3	NM_032447
FBXW7	NM_018315
FGF1	NM_000800
FGF10	NM_004465
FGF19	NM_005117
FGF2	NM_002006
FGF23	NM_020638
FGF3	NM_005247
FGF4	NM_002007
FGF5	NM_004464
FGF6	NM_020996
FGF7	NM_002009
FGF8	NM_006119
FGF9	NM_002010
FGFR1	NM_015850
FGFR2	NM_000141
FGFR3	NM_000142
FGFR4	NM_002011
FH	NM_000143
FLCN	NM_144606
FLT1	NM_002019
FLT3	NM_004119
FLT4	NM_002020
FOXA1	NM_004496
FOXK2	NM_004514
FOXL2	NM_023067
FOXM1	NM_021953
FOXP1	NM_032682
FOXP2	NM_014491
FUBP1	NM_003902
FUS	NM_004960
GAB2	NM_012296
GATA1	NM_002049
GATA2	NM_032638
GATA3	NM_002051
GATA6	NM_005257
GEMIN6	NM_024775
GEN1	NM_182625
GK5	NM_001039547
GLI1	NM_005269
GLIPR1	NM_006851
GLRX	NM_002064
GMEB1	NM_006582
GNA11	NM_002067
GNAQ	NM_002072
GNAS	NM_000516
GPER1	NM_001505
GPRIN2	NM_014696
GREM1	NM_013372
GRIN2A	NM_000833
GSK3B	NM_002093
H3F3A	NM_002107
HDAC2	NM_001527
HFE2	NM_145277
HGF	NM_000601
HIF1A	NM_001530
HMGA2	NM_003483
HNF1A	NM_000545
HNF1B	NM_000458
HOXB13	NM_006361
HRAS	NM_005343
HSD17B3	NM_000197
HSD3B2	NM_000198
HSP90AA1	NM_005348
IDH1	NM_005896
IDH2	NM_002168
IFNL2	NM_172138
IFNLR1	NM_170743
IGF1R	NM_000875
IGF2	NM_000612
IKBKE	NM_014002
IKZF1	NM_006060
IL7R	NM_002185
INHBA	NM_002192
INPP4B	NM_003866
IRF4	NM_002460
IRS2	NM_003749
JAK1	NM_002227
JAK2	NM_004972
JAK3	NM_000215
JUN	NM_002228
KCNJ5	NM_000890
KDM5A	NM_001042603
KDM5C	NM_004187
KDM6A	NM_021140
KDR	NM_002253
KEAP1	NM_012289
KIF1B	NM_015074
KIT	NM_000222
KLF4	NM_004235
KLLN	NM_001126049
KMT2A	NM_005933
KMT2B	NM_014727
KMT2C	NM_170606
KMT2D	NM_003482
KRAS	NM_004985
KRT14	NM_000526
KRT15	NM_002275
KRT5	NM_000424
LARP4	NM_052879
LATS1	NM_004690
LATS2	NM_014572
LBR	NM_002296
LMO1	NM_002315
LRIG3	NM_153377
LRP1B	NM_018557
LYN	NM_002350
MAP2K1	NM_002755
MAP2K2	NM_030662
MAP2K4	NM_003010
MAP3K1	NM_005921
MAPK1	NM_002745
MAPK3	NM_002746
MAPKBP1	NM_014994
MAX	NM_002382
MCL1	NM_021960
MDC1	NM_014641
MDM2	NM_002392
MDM4	NM_002393
MED12	NM_005120
MEF2B	NM_005919
MEN1	NM_000244
MET	NM_000245
MITF	NM_000248
MKI67	NM_002417
MLH1	NM_000249
MLH3	NM_014381
MPL	NM_005373
MRE11A	NM_005590
MSH2	NM_000251
MSH3	NM_002439
MSH6	NM_000179
MST1R	NM_002447
MTOR	NM_004958
MTUS1	NM_020749
MUTYH	NM_012222
MYC	NM_002467
MYCL	NM_005376
MYCN	NM_005378
MYD88	NM_002468
MYOD1	NM_002478
NAB2	NM_005967
NBN	NM_002485
NCOA3	NM_006534
NF1	NM_000267
NF2	NM_000268
NFE2L2	NM_006164
NFKBIA	NM_020529
NKX2-1	NM_003317
NOTCH1	NM_017617
NOTCH2	NM_024408
NOTCH3	NM_000435
NOVA1	NM_002515
NPM1	NM_002520
NR4A3	NM_006981
NRAS	NM_002524
NRG1	NM_004495
NSD1	NM_022455
NTRK1	NM_002529
NTRK2	NM_006180
NTRK3	NM_002530
NUP93	NM_014669
NUTM1	NM_175741
PAK1	NM_002576
PALB2	NM_024675
PALLD	NM_016081
PARK2	NM_004562
PARP1	NM_001618
PAX3	NM_000438
PAX5	NM_016734
PAX7	NM_002584
PAX8	NM_003466
PBRM1	NM_018313
PCBP1	NM_006196
PDCD1	NM_005018
PDCD1LG2	NM_025239
PDGFB	NM_002608
PDGFRA	NM_006206
PDGFRB	NM_002609
PDPK1	NM_002613
PGR	NM_000926
PIK3CA	NM_006218
PIK3CB	NM_006219
PIK3CD	NM_005026
PIK3CG	NM_002649
PIK3R1	NM_181504
PIK3R2	NM_005027
PIM1	NM_002648
PLAUR	NM_002659
PLCG2	NM_002661
PLIN2	NM_001122
PMS1	NM_000534
PMS2	NM_000535
POLD1	NM_002691
POLE	NM_006231
PPIB	NM_000942
PPP2R1A	NM_014225
PPP2R2A	NM_002717
PRDM1	NM_001198
PREX2	NM_024870
PRKACA	NM_002730
PRKACB	NM_002731
PRKAR1A	NM_002734
PRKCI	NM_002740
PRSS1	NM_002769
PSME2	NM_002818
PTCH1	NM_000264
PTEN	NM_000314
PTN	NM_002825
PTPN11	NM_002834
PTPRD	NM_002839
PTPRT	NM_007050
PZP	NM_002864
RAC1	NM_006908
RAD21	NM_006265
RAD50	NM_005732
RAD51	NM_002875
RAD51B	NM_002877
RAD51C	NM_002876
RAD51D	NM_002878
RAD52	NM_134424
RAD54L	NM_003579
RAF1	NM_002880
RARA	NM_000964
RB1	NM_000321
RBM10	NM_005676
RECK	NM_021111
RECQL	NM_002907
RECQL4	NM_004260
REL	NM_002908
RET	NM_020630
RHBDF2	NM_024599
RHEB	NM_005614
RHOA	NM_001664
RICTOR	NM_152756
RIF1	NM_018151
RILP	NM_031430
RIT1	NM_006912
RNASEL	NM_021133
RNF43	NM_017763
ROBO2	NM_002942
ROS1	NM_002944
RPS6KB1	NM_003161
RPTOR	NM_020761
RSF1	NM_016578
RUNX1	NM_001754
SBDS	NM_016038
SDHA	NM_004168
SDHAF2	NM_017841
SDHB	NM_003000
SDHC	NM_003001
SDHD	NM_003002
SELL	NM_000655
SETBP1	NM_015559
SETD2	NM_014159
SETD7	NM_030648
SF3B1	NM_012433
SH2B3	NM_005475
SLX4	NM_032444
SMAD2	NM_005901
SMAD3	NM_005902
SMAD4	NM_005359
SMARCA4	NM_003072
SMARCB1	NM_003073
SMO	NM_005631
SOCS1	NM_003745
SOCS6	NM_004232
SOX2	NM_003106
SOX9	NM_000346
SPEN	NM_015001
SPINK1	NM_003122
SPOP	NM_003563
SRC	NM_005417
SRD5A2	NM_000348
SRSF2	NM_003016
SS18	NM_005637
STAG2	NM_006603
STAT3	NM_003150
STK11	NM_000455
SUFU	NM_016169
SULT1A1	NM_001055
SUZ12	NM_015355
SYK	NM_003177
SYNE1	NM_033071
SHOX	NM_000451
TBX3	NM_005996
TERT	NM_198253
TET1	NM_030625
TET2	NM_017628
TFE3	NM_006521
TGFBR2	NM_003242
TMEM127	NM_017849
TMPRSS2	NM_005656
TNFAIP3	NM_006290
TNFRSF14	NM_003820
TNFRSF19	NM_018647
TNFSF8	NM_001244
TOP1	NM_003286
TP53	NM_000546
TPMT	NM_000367
TRAF1	NM_005658
TSC1	NM_000368
TSC2	NM_000548
TSHR	NM_000369
TSPAN31	NM_005981
TYMS	NM_001071
U2AF1	NM_006758
UGT1A1	NM_000463
VEGFA	NM_003376
VHL	NM_000551
WAS	NM_000377
WRN	NM_000553
WT1	NM_000378
XPO1	NM_003400
YAP1	NM_006106
YES1	NM_005433
ZBTB16	NM_006006
ZNF367	NM_153695
ZNF717	NM_001128223
ZNF750	NM_024702
